# Supplementary material for: The Influence of Light Wavelength on Human HPA Axis Rhythms: A Systematic Review
Source: MDPI journal article supplement (doi:10.3390/life13101968), 2023-09-26
Supplement: s1 [file s1]

**Supplementary Table Providing Summary Statistics for Each Group.** For each study included in the systematic review, this table presents the sample size of each group and the mean and standard deviation of cortisol measurements. If this information was not available, alternative descriptive statistics are provided where possible.

| Author                     | Light Condition      | N  | Mean Cortisol Yield (SE or SD)                                                                                                                             |
|----------------------------|----------------------|----|------------------------------------------------------------------------------------------------------------------------------------------------------------|
| Babilon et al. 2022 [10]   | Red Light            | 4  | 9.68 (SEM 1.21) nmol L <sup>-1</sup>                                                                                                                       |
|                            | Blue Light           |    | 12.04 (SEM 1.54) nmol L <sup>-1</sup>                                                                                                                      |
| Cai et al. 2021 [40]       | Blue-enriched Lamp 1 | 17 | Not Available                                                                                                                                              |
|                            | Blue-enriched Lamp 2 |    |                                                                                                                                                            |
|                            | Blue-enriched Lamp 3 |    |                                                                                                                                                            |
|                            | Dorm Lamp            |    |                                                                                                                                                            |
| Cheung et al. 2016 [73]    | Blue Light           | 19 | Morning: 2178 (SD 408) mg/dL<br>Evening: 972 (SD 438) mg/dL                                                                                                |
|                            | Dim Light            |    | Morning: 2292 (SD 711) mg/dL<br>Evening: 1206 (SD 741) mg/dL                                                                                               |
| Choi et al. 2019 [43]      | White Light          | 15 | Percentage Decrease:<br>13.36% (SEM 20.88)                                                                                                                 |
|                            | Blue Light           |    | Percentage Decrease:<br>43% (SEM 6.12)                                                                                                                     |
| Danilenko et al. 2015 [44] | White Light          | 10 | Median (10 <sup>th</sup> and 90 <sup>th</sup> percentiles):<br>0 min: 638 (510–763) nmol/l<br>22 min: 581 (436–763) nmol/l<br>44 min: 501 (367–641) nmol/l |
|                            | Red Light            | 6  | Median (10 <sup>th</sup> and 90 <sup>th</sup> percentiles):<br>0 min: 640 (479–842) nmol/l<br>22 min: 617 (395–707) nmol/l<br>44 min: 478 (372–631) nmol/l |
| Figueiro et al. 2010 [45]  | Red Light            | 12 | Mean normalized concentration:<br>Day: 0.29<br>Night: 0.31                                                                                                 |
|                            | Blue Light           |    | Mean normalized concentration:<br>Day: 0.34<br>Night: 0.28                                                                                                 |
|                            | Dark                 |    | Mean normalized concentration:<br>Day: 0.32<br>Night: 0.18                                                                                                 |
| Ivanova et al. 2017 [57]   | White Light          | 10 | 0 min: 6.31 ng/mL<br>30 min: 5.30 ng/mL<br>55 min: 3.71 ng/mL                                                                                              |
|                            | Red Light            |    | 0 min: 7.27 ng/mL<br>30 min: 5.00 ng/mL<br>55 min: 5.96 ng/mL                                                                                              |
| Petrowski et al. 2021 [9]  | Bright Light         | 27 | 11.40 (3.70) nmol/l                                                                                                                                        |
|                            | Red Light            | 31 | 8.51 (3.33) nmol/l                                                                                                                                         |
|                            | Blue Light           | 28 | 9.21 (3.62) nmol/l                                                                                                                                         |
|                            | Dim Light            | 25 | 8.63 (5.28) nmol/l                                                                                                                                         |

| Author                     | Light Condition     | N  | Mean Cortisol Yield (SE or SD)                                                                                                                                                                          |
|----------------------------|---------------------|----|---------------------------------------------------------------------------------------------------------------------------------------------------------------------------------------------------------|
| Petrowski at al. 2021 [42] | Bright Light        | 49 | 9.72 (SD 5.97) nmol/l                                                                                                                                                                                   |
|                            | Red Light           |    | 9.79 (SD 4.82) nmol/l                                                                                                                                                                                   |
|                            | Blue Light          |    | 12.86 (SD 6.00) nmol/l                                                                                                                                                                                  |
|                            | Dim Light           |    | 8.85 (SD 4.70) nmol/l                                                                                                                                                                                   |
| Petrowski et al. 2019 [41] | Bright Light        | 30 | 11.41 (SD 5.07) nmol/l                                                                                                                                                                                  |
|                            | Dim Light           |    | 8.40 (SD 4.54) nmol/l                                                                                                                                                                                   |
|                            | Blue Light          | 23 | 13.02 (SD 5.97) nmol/l                                                                                                                                                                                  |
|                            | Green Light         |    | 12.15 (SD 5.96) nmol/l                                                                                                                                                                                  |
|                            | Red Light           |    | 9.43 (SD 5.53) nmol/l                                                                                                                                                                                   |
| Sahin et al. 2014 [74]     | White Light Glasses | 13 | Not Available                                                                                                                                                                                           |
|                            | Red Light Glasses   |    |                                                                                                                                                                                                         |
|                            | Dim Light           |    |                                                                                                                                                                                                         |
| Schmidt et al. 2018 [46]   | Red Light           | 17 | Pre-light:<br>0.65 ug/L<br>0.55 ug/L<br>0.53 ug/L<br>0.35 ug/L<br>0.24 ug/L<br><br>Light:<br>0.21 ug/L<br>0.27 ug/L<br>0.30 ug/L<br>0.29 ug/L<br><br>Post-light:<br>0.31 ug/L<br>0.40 ug/L<br>0.42 ug/L |
|                            | Blue Light          |    | Pre-light:<br>0.75 ug/L<br>0.43 ug/L<br>0.37 ug/L<br>0.34 ug/L<br>0.23 ug/L<br><br>Light:<br>0.23 ug/L<br>0.29 ug/L<br>0.36 ug/L<br>0.28 ug/L<br><br>Post-light:<br>0.29 ug/L<br>0.41 ug/L<br>0.54 ug/L |

## References

10. Babilon, S.; Myland, P.; Klabes, J.; Simon, J.; Khanh, T.Q. Study protocol for measuring the impact of (quasi-)monochromatic light on post-awakening cortisol secretion under controlled laboratory conditions. *PLOS ONE* **2022**, *17*, e0267659, doi:10.1371/journal.pone.0267659.
40. Cai, J.; Hao, W.; Zeng, S.; Qu, X.; Guo, Y.; Tang, S.; An, X.; Luo, A. Effects of Red Light on Circadian Rhythm: A Comparison Among Lamps With Similar Correlated Color Temperatures Yet Distinct Spectrums. *IEEE Access* **2021**, *9*, 59222-59230, doi:10.1109/ACCESS.2021.3073102.
73. Cheung, I.N.; Zee, P.C.; Shalman, D.; Malkani, R.G.; Kang, J.; Reid, K.J. Morning and Evening Blue-Enriched Light Exposure Alters Metabolic Function in Normal Weight Adults. *PLOS ONE* **2016**, *11*, e0155601, doi:10.1371/journal.pone.0155601.
43. Choi, K.; Shin, C.; Kim, T.; Chung, H.J.; Suk, H.-J. Awakening effects of blue-enriched morning light exposure on university students' physiological and subjective responses. *Scientific Reports* **2019**, *9*, 345, doi:10.1038/s41598-018-36791-5.
44. Danilenko, K.V.; Sergeeva, O.Y. Immediate effect of blue-enhanced light on reproductive hormones in women. *Neuro Endocrinol Lett* **2015**, *36*, 84-90.
45. Figueiro, M.G.; Rea, M.S. The Effects of Red and Blue Lights on Circadian Variations in Cortisol, Alpha Amylase, and Melatonin. *International Journal of Endocrinology* **2010**, *2010*, 829351, doi:10.1155/2010/829351.
57. Ivanova, I.A.; Danilenko, K.V.; Aftanas, L.I. Investigation of an Immediate Effect of Bright Light on Oxygen Consumption, Heart Rate, Cortisol, and  $\alpha$ -Amylase in Seasonal Affective Disorder Subjects and Healthy Controls. *Neuropsychobiology* **2016**, *74*, 219-225, doi:10.1159/000477248.
9. Petrowski, K.; Buehrer, S.; Niedling, M.; Schmalbach, B. The effects of light exposure on the cortisol stress response in human males. *Stress* **2021**, *24*, 29-35, doi:10.1080/10253890.2020.1741543.
42. Petrowski, K.; Buehrer, S.; Albus, C.; Schmalbach, B. Increase in cortisol concentration due to standardized bright and blue light exposure on saliva cortisol in the morning following sleep laboratory. *Stress* **2021**, *24*, 331-337, doi:10.1080/10253890.2020.1803265.
41. Petrowski, K.; Schmalbach, B.; Niedling, M.; Stalder, T. The effects of post-awakening light exposure on the cortisol awakening response in healthy male individuals. *Psychoneuroendocrinology* **2019**, *108*, 28-34, doi:10.1016/j.psyneuen.2019.05.016.
74. Sahin, L.; Wood, B.M.; Plitnick, B.; Figueiro, M.G. Daytime light exposure: Effects on biomarkers, measures of alertness, and performance. *Behav Brain Res* **2014**, *274*, 176-185, doi:10.1016/j.bbr.2014.08.017.
46. Schmidt, C.; Xhrouet, M.; Hamacher, M.; Delloye, E.; LeGoff, C.; Cavalier, E.; Collette, F.; Vandewalle, G. Light exposure via a head-mounted device suppresses melatonin and improves vigilant attention without affecting cortisol and comfort. *PsyCh Journal* **2018**, *7*, 163-175, doi:<https://doi.org/10.1002/pchj.215>.
